# Supplementary material
Source: publisher site journal article supplement (https://www.dovepress.com/get_supplementary_file.php?f=358302.docx)
Supplement: Supplementary file 1 [file get_supplementary_file.php]

Table S1. Treatment-related adverse events in patients with different treatments

| Adverse Event | PD-1  (*n* = 24) | | PD-1+chemotherapy (*n* = 26) | | PD-1+chemotherapy+anti-angiogenic therapy (*n* = 52) | |
| --- | --- | --- | --- | --- | --- | --- |
|  | Any Grade | Grade  3–5 | Any Grade | Grade 3–5 | Any Grade | Grade 3–5 |
| Total | 9 (37.5) | 3 (12.5) | 14 (53.8) | 4 (15.4) | 32 (61.5) | 10 (19.2) |
| Thrombocytopenia | 1 (4.2) | 0 (0) | 3 (11.5) | 2 (7.7) | 11 (21.2) | 6 (11.5) |
| Hepatic dysfunction | 3 (12.5) | 1 (4.2) | 2 (7.7) | 1 (3.8) | 9 (17.3) | 2 (3.8) |
| Anemia | 3 (12.5) | 2 (8.3) | 3 (11.5) | 2 (7.7) | 6 (11.5) | 1 (1.9) |
| Leukopenia | 1 (4.2) | 0 (0) | 2 (7.7) | 0 (0) | 8 (15.4) | 3 (5.8) |
| Rash | 2 (8.3) | 0 (0) | 1 (3.8) | 0 (0) | 6 (11.5) | 0 (0) |
| Renal dysfunction | 1 (4.2) | 1 (4.2) | 1 (3.8) | 0 (0) | 6 (11.5) | 2 (3.8) |
| Hypothyroidism | 2 (8.3) | 0 (0) | 2 (7.7) | 0 (0) | 4 (7.7) | 0 (0) |
| Diarrhea | 1 (4.2) | 0 (0) | 2 (7.7) | 0 (0) | 4 (7.7) | 1 (1.9) |
| Hemorrhage | 0 (0) | 0 (0) | 2 (7.7) | 0 (0) | 5 (9.6) | 1 (1.9) |
| Hypertension | 0 (0) | 0 (0) | 1 (3.8) | 0 (0) | 5 (9.6) | 0 (0) |
| Fever | 2 (8.3) | 0 (0) | 1 (3.8) | 0 (0) | 3 (5.8) | 0 (0) |
| Hand-foot syndrome | 0 (0) | 0 (0) | 0 (0) | 0 (0) | 5 (9.6) | 0 (0) |
| Myalgia | 1 (4.2) | 0 (0) | 1 (3.8) | 0 (0) | 2 (3.8) | 0 (0) |
| Fistula | 0 (0) | 0 (0) | 2 (7.7) | 0 (0) | 2 (3.8) | 1 (1.9) |
| Fatigue | 0 (0) | 0 (0) | 0 (0) | 0 (0) | 4 (7.7) | 0 (0) |
| Vomiting | 2 (8.3) | 0 (0) | 1 (3.8) | 0 (0) | 0 (0) | 0 (0) |
| Hyperthyroidism | 2 (8.3) | 0 (0) | 0 (0) | 0 (0) | 0 (0) | 0 (0) |
| RCCEP | 0 (0) | 0 (0) | 1 (3.8) | 0 (0) | 1 (1.9) | 0 (0) |
| Constipation | 0 (0) | 0 (0) | 0 (0) | 0 (0) | 2 (3.8) | 0 (0) |
| Myocarditis | 1 (4.2) | 1(4.2) | 0 (0) | 0 (0) | 0 (0) | 0 (0) |
| Proteinuria | 0 (0) | 0 (0) | 1 (3.8) | 1 (3.8) | 0 (0) | 0 (0) |
| Thrombosis | 0 (0) | 0 (0) | 0 (0) | 0 (0) | 1 (1.9) | 1 (1.9) |
| Immune-related adverse event |  |  |  |  |  |  |
| Hepatic dysfunction | 2 (8.3) | 1 (4.2) | 1 (3.8) | 0 (0) | 9 (17.3) | 1 (1.9) |
| Rash | 2 (8.3) | 0 (0) | 1 (3.8) | 0 (0) | 6 (11.5) | 0 (0) |
| Hypothyroidism | 2 (8.3) | 0 (0) | 2 (7.7) | 0 (0) | 4 (7.7) | 0 (0) |
| RCCEP | 0 (0) | 0 (0) | 1 (3.8) | 0 (0) | 1 (1.9) | 0 (0) |
| Myocarditis | 1 (4.2) | 1 (4.2) | 0 (0) | 0 (0) | 0 (0) | 0 (0) |

**Notes:** Values are presented as *n* (%)unless otherwise specified.

**Abbreviations:** RCCEP: Reactive cutaneous capillary endothelial proliferation
